# Supplementary material for: Concomitant polymorphs of 2,2′,6,6′-tetramethyl-4,4′-terphenyldiol: the β-quinol network reproduced in a metastable polymorph
Source: Royal Society of Chemistry journal article supplement (doi:10.1039/b500665a), 2005-01-01
Supplement: b500665a.pdf [file b500665a.pdf]

### Supplementary Information

#### Concomitant polymorphs of 2,2',6,6'-tetramethyl-4,4'-terphenyldiol: the $\beta$ -quinol network reproduced in a metastable polymorph†

*Srinivasulu Aitipamula and Ashwini Nangia\**

##### Synthesis of **1**

A mixture of cyclohexane-1,4-dione (0.50 g, 8.0 mmol) and 2,6-dimethylphenol (2.30 g, 18.9 mmol) in 1:1 dioxane/water mixture (10 mL) was treated drop wise with concentrated  $\text{H}_2\text{SO}_4$  (15 mL) at 0 °C. The reaction mixture was stirred at room temperature for 72 h under  $\text{O}_2$  atmosphere. The reaction mixture was neutralized and extracted with ether, dried with anhydrous  $\text{MgSO}_4$  and solvent evaporated. Pure compound **1** (0.71 g, 50%) was obtained by column chromatography using EtOAc/hexane mixture (3%). The intermediate dihydrobenzene compound was present to the extent of 30% when the reaction was carried without oxygen. **1**:  $^1\text{H}$ -NMR ( $\text{DMSO}-d_6$ )  $\delta$  2.24 (12 H, s), 7.26 (4 H, s), 7.59 (4 H, s), 8.33 (2 H, s). IR (KBr pellets): 3320, 1597, 1477, 1319  $\text{cm}^{-1}$ , m.p. 257-259 °C. Terphenol **2** was prepared in the same way by condensation with phenol.

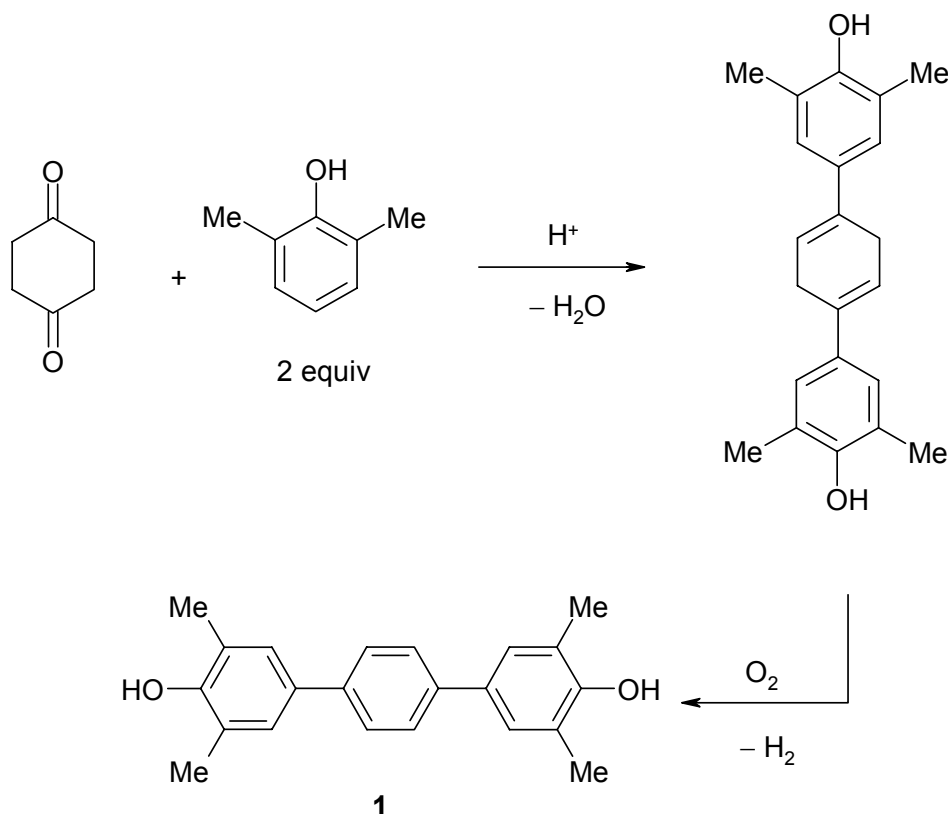

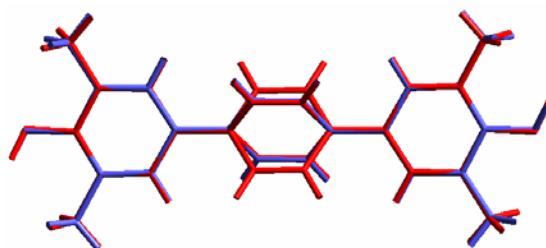

**Fig. S1** Different conformations of the central phenyl ring in polymorphs **1a** (blue) and **1b** (red). The conformation of the central phenyl ring in **1a** almost overlaps with the major occupancy of the disordered phenyl ring of **1b**. The minor occupancy phenyl ring has a different orientation.

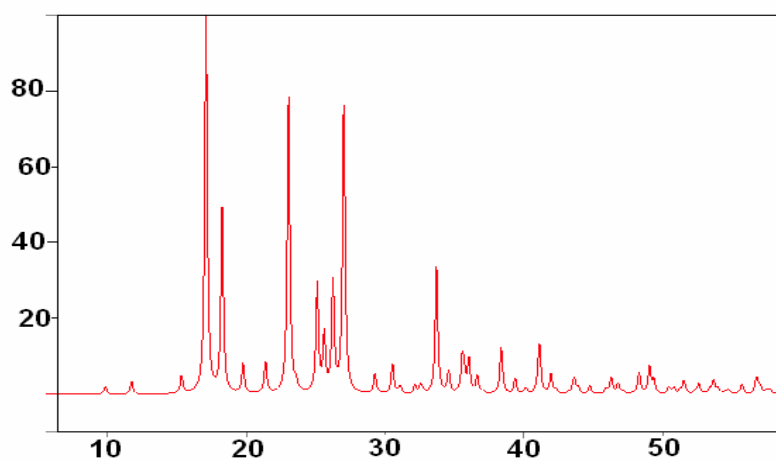

**Fig. S2 (a)** Simulated trace of the rhombohedral form **1a**.

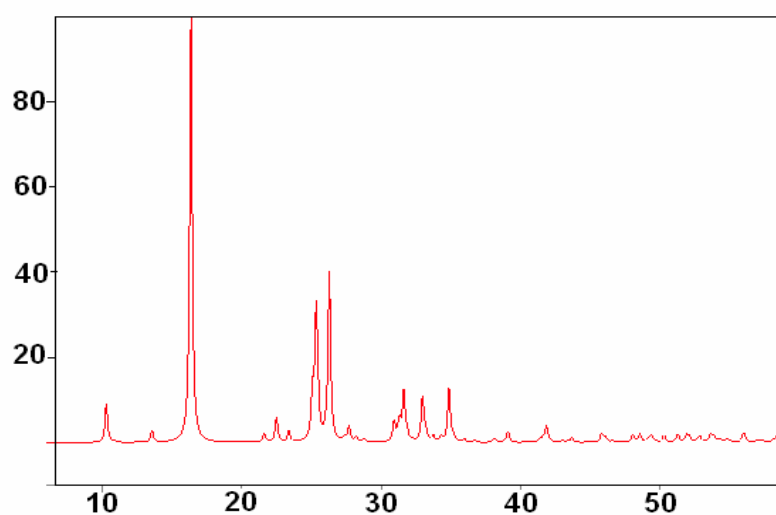

**Fig. S2 (b)** Simulated trace of the monoclinic form **1b**.

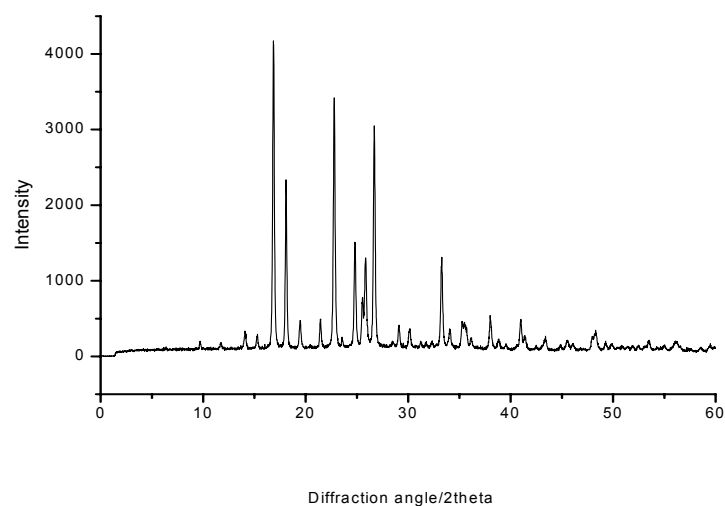

**Fig. S2 (c)** Experimental PXRD of microcrystalline powder after grinding. This material is mostly form **1a**.

Powder XRD is recorded on INEL XRG3000 instrument using Co-K $\alpha$ 1 radiation ( $\lambda=1.788965$  Å,  $2\theta$  5-50°).

Differential scanning calorimetry was performed on Mettler Toledo DSC 822e module. The solid (4-6 mg) was placed in crimped but vented aluminum pan and heated from 30-300 °C @ 2K/min maintaining dry nitrogen purge @ 150 mL/min. In the heat-cool-heat cycle for **1a**, the sample was cooled to room temperature @ 5K/min.
